# Supplementary material
Source: PubMed Central journal article supplement (PMC9769698)
Supplement: NIHMS1800357-supplement-1.pdf [file NIHMS1800357-supplement-1.pdf]

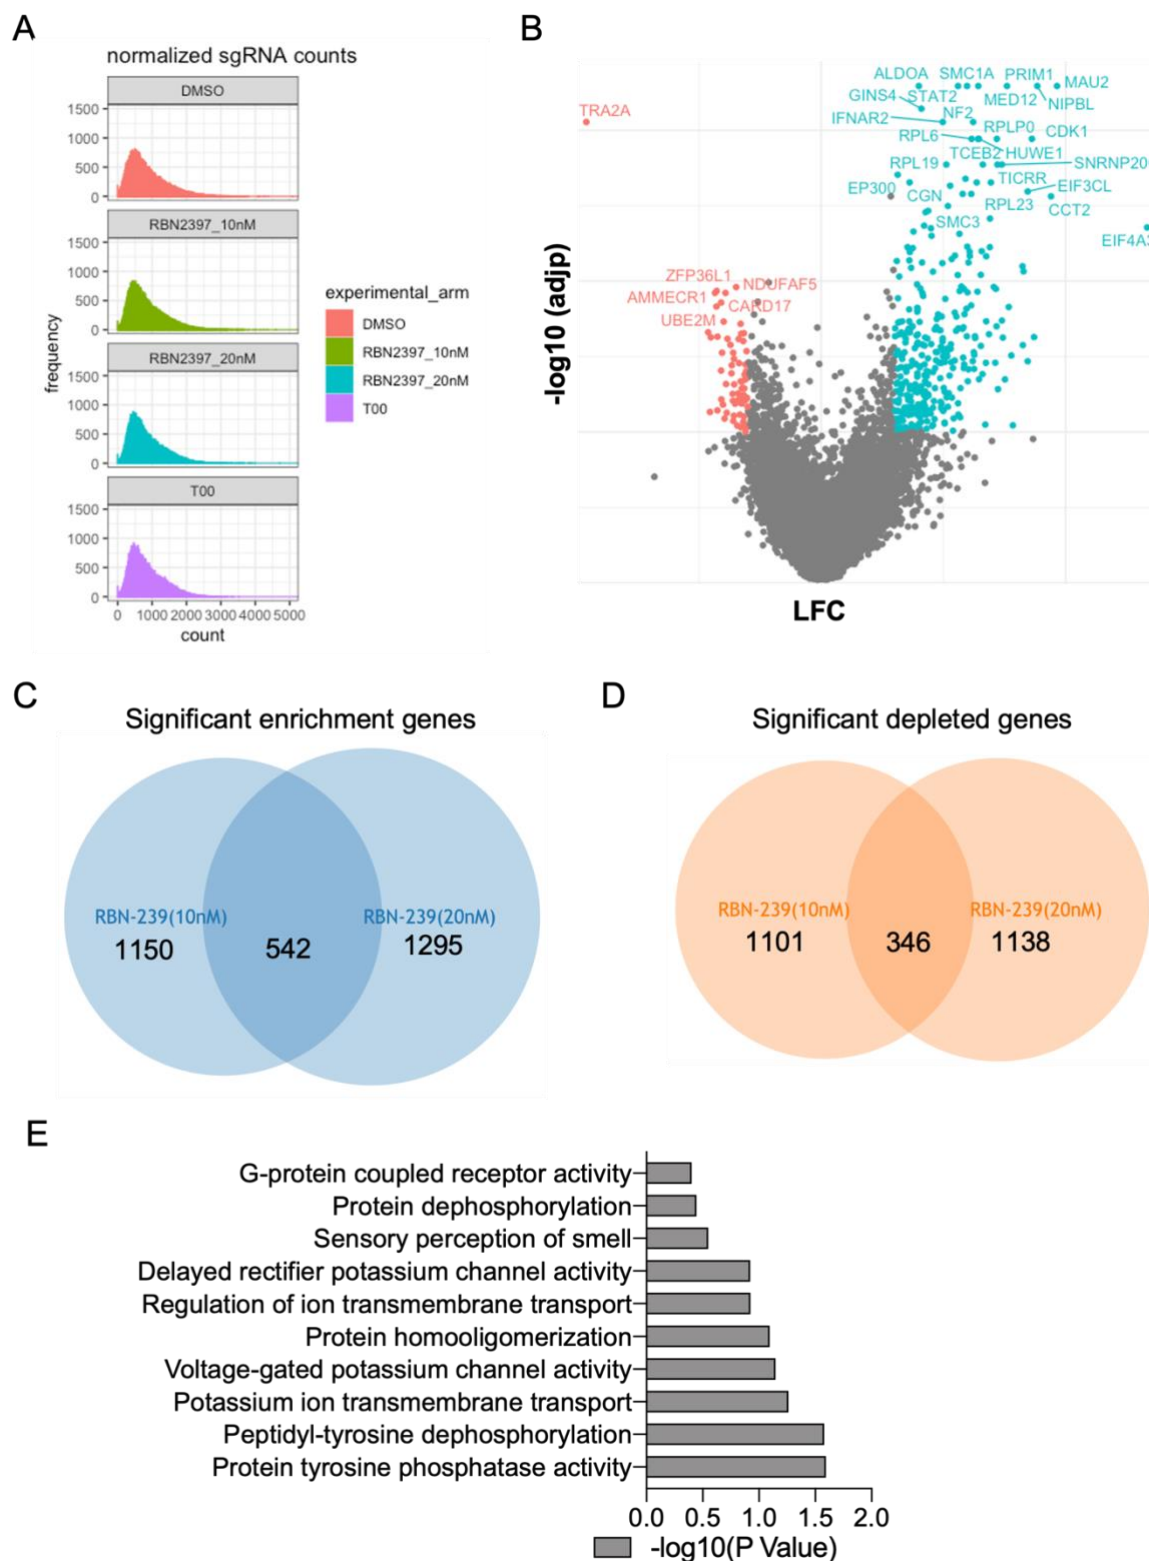

Fig.S1. Chen, et al

**Supplementary Fig. 1 Whole-genome CRISPR-Cas9 screen in NCI-H1373 cells.**

**A**, Histograms showing the frequency of all sgRNA counts in DMSO and RBN-2397 treated samples. **B**, Volcano plot for hits from the DMSO vs RBN-2397(20 nM) CRISPR screen. x axis shows gene-level LFC (median of LFC for all sgRNAs per gene, scaled). y axis shows the  $-\log_{10}(\text{adjp})$  as calculated by MAGeCK. Positive hits (enriched in 20nM RBN-2397 treated cells,  $\text{LFC} > 0.6$  and  $-\log_{10}(\text{adjp}) > 2$  are in blue and negative hits (depleted in 20nM RBN-2397 treated cells,  $\text{LFC} < -0.6$  and  $-\log_{10}(\text{adjp}) > 2$  are in red. **C**, Venn diagram of significantly enriched genes in RBN-2397(10 nM) vs DMSO and RBN-2397(20 nM) vs DMSO ( $P < 0.05$ ) analyses **D**, Venn diagram of significantly depleted genes in RBN-2397(10 nM) vs DMSO and RBN-2397(20 nM) vs DMSO analyses ( $P < 0.05$ ). **E**, Pathway analysis of the 346 shared hits in (**D**).
