# Supplementary material
Source: PubMed Central journal article supplement (PMC9769698)
Supplement: NIHMS1800357-supplement-2.pdf [file NIHMS1800357-supplement-2.pdf]

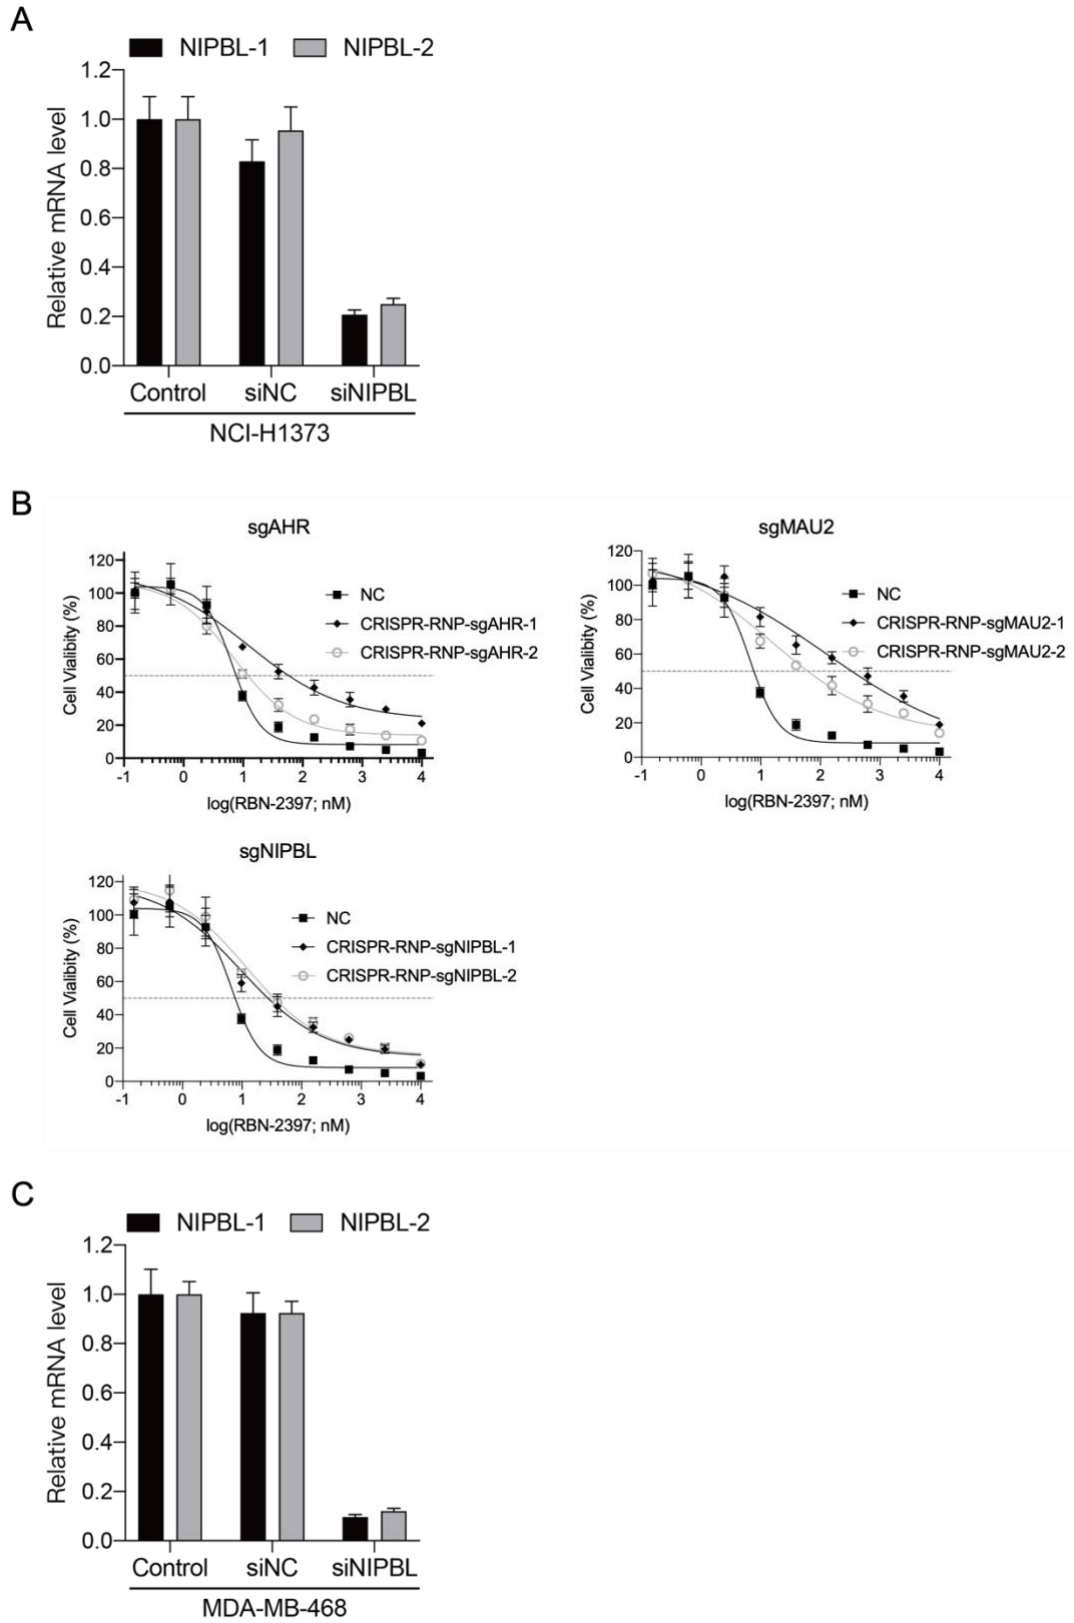

Fig.S2. Chen, et al

**Supplementary Fig. 2 Validation of CRISPR/Cas9 screening hit genes in NCI-H1373.**

**A**, RT-qPCR showing relative levels of NIPBL mRNA in NCI-H1373 cells 48 hours after being transfected with siNC or siNIPBL. Untransfected cells are shown as a control. **B**, Dose response survival curves for parental and AHR/NIPBL/MAU2 knockout NCI-H1373 cells treated with RBN-2397 for 7 days. **C**, RT-qPCR showing relative levels of *NIPBL* mRNA in MDA-MB-468 cells 48 hours after transfection with siNC or siNIPBL. Data is plotted as mean  $\pm$  SD for triplicate values.
