# Supplementary material
Source: PubMed Central journal article supplement (PMC9769698)
Supplement: NIHMS1800357-supplement-4.pdf [file NIHMS1800357-supplement-4.pdf]

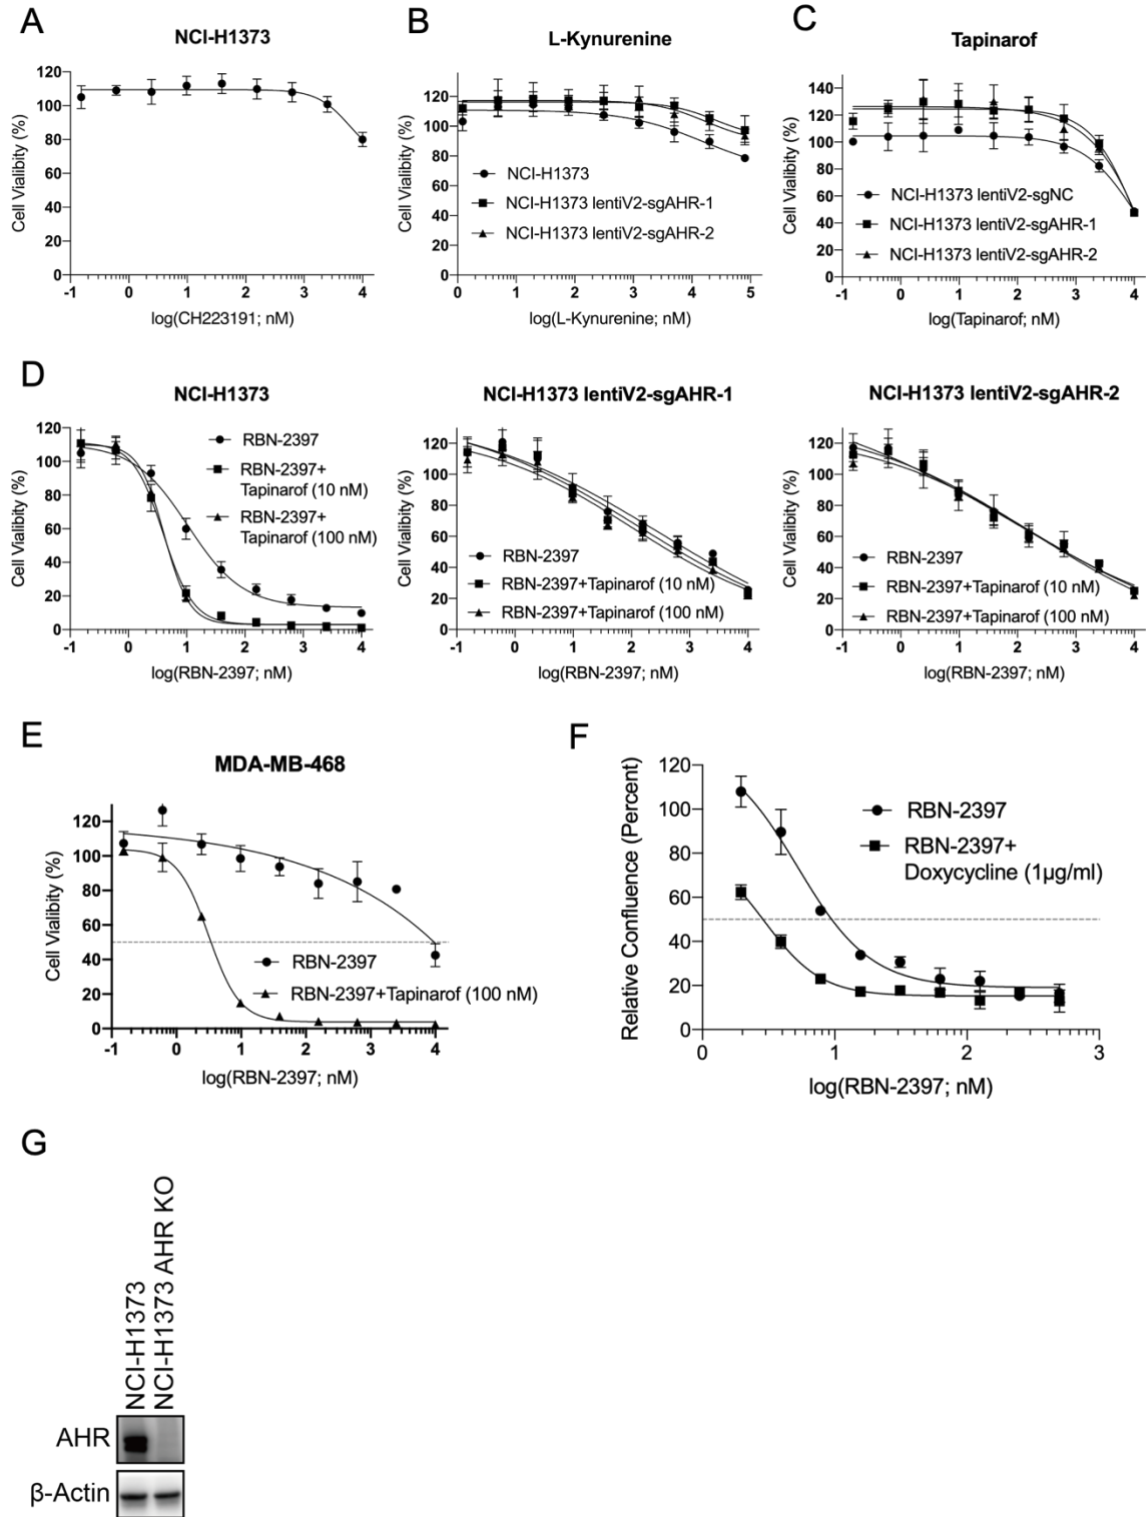

Fig.S4. Chen, et al

**Supplementary Fig. 4 AHR mediates PARP7 inhibitor sensitivity.**

**A**, Dose response survival curves for NCI-H1373 treated with CH-223191 **B-C**, Dose response survival curves for NCI-H1373 and *AHR* knockout cells treated with (b) L-kynurenine or (c) tapinarof for 7 days. **D**, Dose response survival curves for NCI-H1373 and *AHR* knockout cells treated with RBN-2397 alone or combined with indicated concentration of tapinarof for 7 days. **E**, Dose response survival curves for MDA-MB-468 cells treated with RBN-2397 alone or combined with indicated concentration of tapinarof for 7 days. **F**, Dose response survival curves for NCI-H1373 cells with and without dox-induced expression of an *AHR* transgene. Data is shown as mean values  $\pm$  SD;  $n = 3$ . **G**, Western blot of cell lysates from NCI-H1373 cells and *AHR* knockout clones.
