# Supplementary material
Source: PubMed Central journal article supplement (PMC9769698)
Supplement: NIHMS1800357-supplement-5.pdf [file NIHMS1800357-supplement-5.pdf]

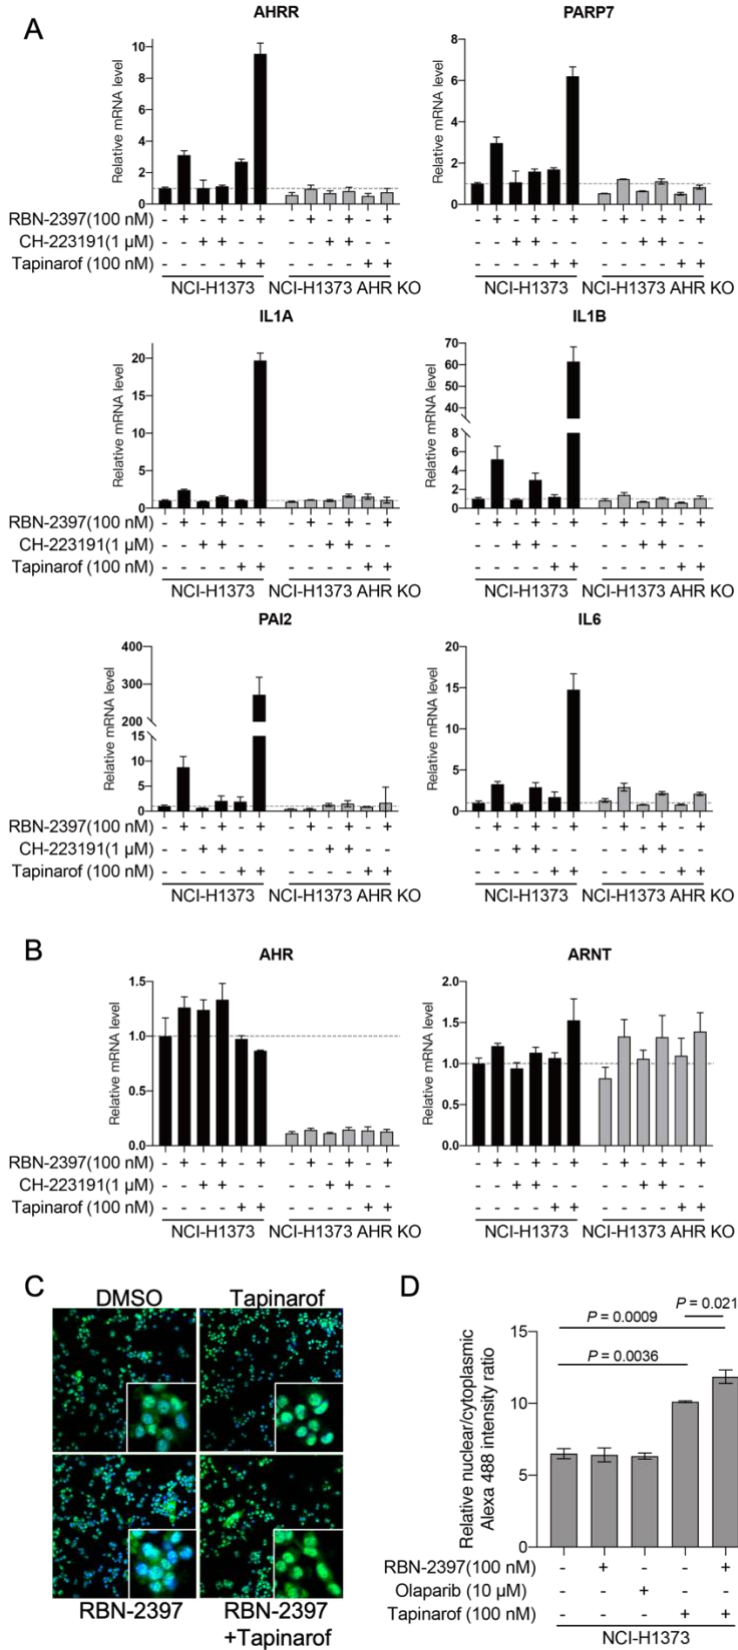

Fig.S5. Chen, et al

**Supplementary Fig. 5 RBN-2397 activates the transcription of AHR target genes through AHR activity and localization but does not affect AHR/ARNT mRNA levels.**

**A**, RT-qPCR showing relative mRNA levels of AHR target genes in NCI-H1373 and *AHR* knockout cells treated with the indicated drugs for 24 hours. **B**, RT-qPCR showing relative mRNA levels of *AHR* and *ARNT* in NCI-H1373 and *AHR* knockout cells treated with the indicated drugs for 24 hours. Data is shown as mean values  $\pm$  SD;  $n = 2$ . **C**, Representative images of NCI-H1373 cells treated with RBN-2397, tapinarof or a combination of both drugs for 2 h and then stained with AhR Rabbit mAb and Goat anti-Rabbit IgG Alexa Fluor 488 secondary antibody and. DMSO treated cells are shown as a vehicle control. **D**, Relative nuclear/cytoplasmic Alexa 488 intensity ratio of cells from (**C**). Data shown as mean values  $\pm$  SD; At least 25000 cells were analyzed each group, from triplicate wells.
