# Supplementary material
Source: PubMed Central journal article supplement (PMC9769698)
Supplement: NIHMS1800357-supplement-6.pdf [file NIHMS1800357-supplement-6.pdf]

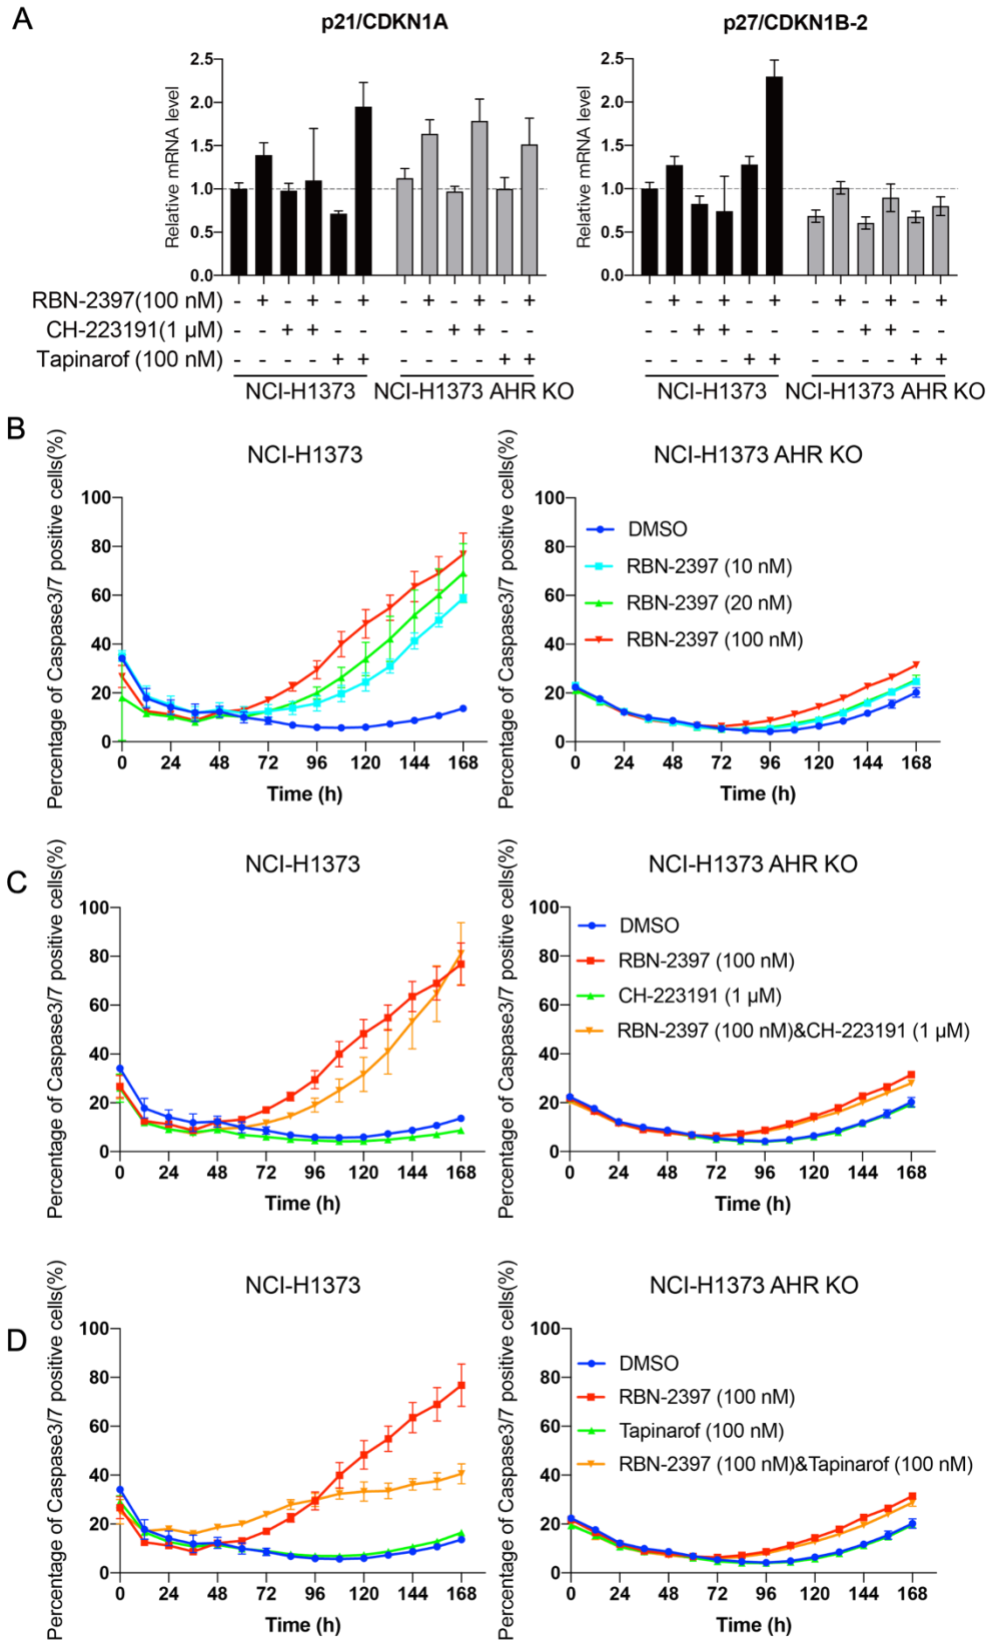

Fig.S6. Chen, et al

**Supplementary Fig. 6 RBN-2397 induces the up-regulation of *p21/p27* transcription and activates Caspase3/7 through AHR.**

**A**, RT-qPCR showing relative mRNA levels of *p21* and *p27* in NCI-H1373 and *AHR* knockout cells treated with the indicated drugs for 24 hours. Data is shown as mean values  $\pm$  SD;  $n = 2$ . **B-D**, Fraction of NCI-H1373 (left) and *AHR* knockout (right) cells staining positive for Caspase-3/7 after treatment with the indicated drugs for 24 hours. Data is shown as mean values  $\pm$  SD;  $n = 3$ .
