# Supplementary material
Source: PubMed Central journal article supplement (PMC9769698)
Supplement: NIHMS1800357-supplement-7.pdf [file NIHMS1800357-supplement-7.pdf]

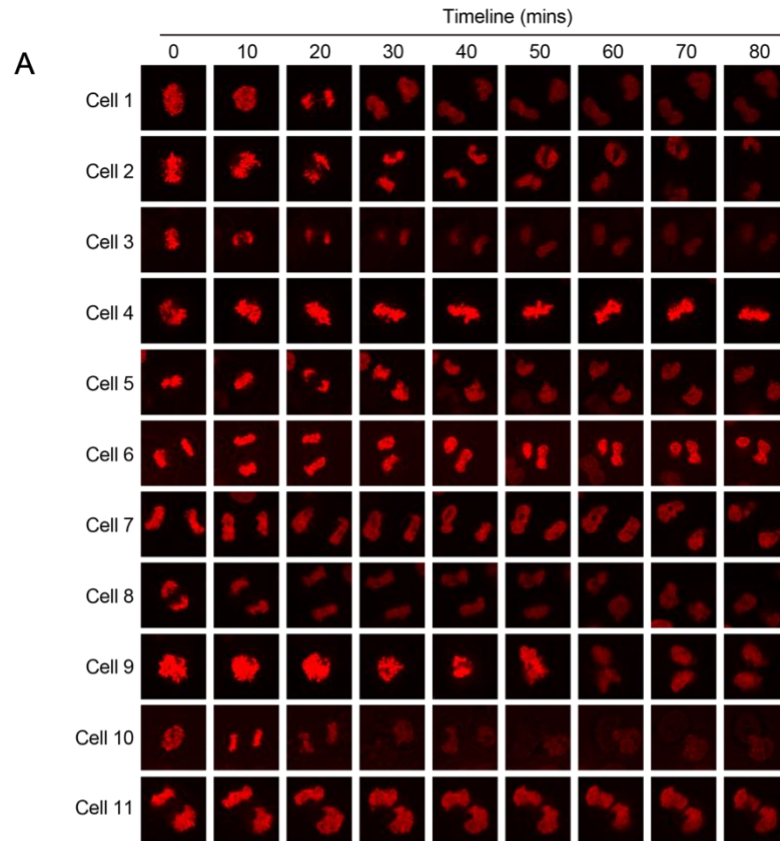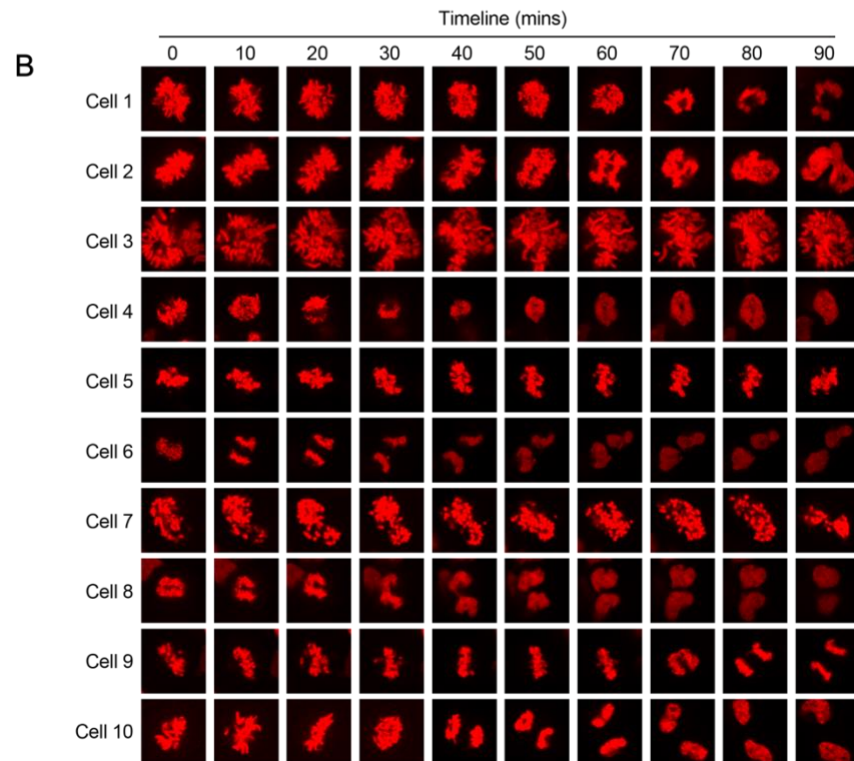

*Fig.S7. Chen, et al*

**Supplementary Fig. 7 RBN-2397 disrupts mitosis in NCI-H1373 cells**

Time-lapse images of live cell microscopy illustrating mitotic progression of NCI-H1373 cells treated with (A) vehicle or (B) 1  $\mu$ M RBN-2397.
