# Supplementary material
Source: PubMed Central journal article supplement (PMC9769698)
Supplement: NIHMS1800357-supplement-8.pdf [file NIHMS1800357-supplement-8.pdf]

**Supplementary Table 1. List of Primers used for gene cloning**

| Primers                            | F Primer                                                                  | R Primer                                           |
|------------------------------------|---------------------------------------------------------------------------|----------------------------------------------------|
| PARP7 subclone primers             | tctgCGgtctgccgaaaagctgcagAT<br>GGAAATGGAAACCAACCGAA<br>CC                 | gttcagtagcctccccgtttaaACTTAA<br>ACCTTATCGTCGTCATCC |
| V5-TurboID-NES<br>subclone primers | CCCTCGTaaaggtctagagctagc<br>gaattcgaatttgccaccatgggcaagc<br>ccatccccaac   | GTTCCGGTGGTTTCCATTTC<br>ATctgcagctttcggcagacc      |
| PARP7 Sequencing<br>Primers        | CAGATACCGGAAGCCCATC<br>C                                                  | GGCATGATGAATTGATTTC                                |
| V5-TurboID Sequencing<br>Primers   | GAACGCTAAACAGATTCTG<br>G                                                  | CATTTGACTCGCACCTTGTC                               |
| AHR subclone primers               | ccctcgtaaaggtctagagctagcgaat<br>tcgaatttgccaccATGAACAGCA<br>GCAGCGCCAACAT | gttcagtagcctccccgtttaaACTTAA<br>ACCTTATCGTCGTCATCC |
| AHR Sequencing Primers             | CCACCTCAGTTGGCTTTGTT                                                      | AGCCAAGGACTGTTGCTGTT                               |
