# Supplementary material
Source: PubMed Central journal article supplement (PMC9769698)
Supplement: NIHMS1800357-supplement-9.pdf [file NIHMS1800357-supplement-9.pdf]

**Supplementary Table 2. Primers used for construction of lentiCRISPRv2 sgRNA plasmids.**

| sgRNA                 | F Primer                      | R Primer                      |
|-----------------------|-------------------------------|-------------------------------|
| lentiV2_non-targeting | caccgACGGAGGCTAAGCGTC<br>GCAA | aaacTTGCGACGCTTAGCCTCC<br>GTc |
| lentiV2-sgNIPBL_1     | caccgTATACGAACTAACCTCC<br>ATG | aaacCATGGAGGTTAGTTCGTAT<br>Ac |
| lentiV2-sgNIPBL_2     | caccgAAGTGAGGACTACCTAC<br>ACA | aaacTGTGTAGGTAGTCCTCACT<br>Tc |
| lentiV2-MAU_1         | caccgGATCTCATCATCGTGCA<br>GTG | aaacCACTGCACGATGATGAGA<br>TCc |
| lentiV2-MAU_2         | caccgAGTTGACAGAGACACAG<br>TAC | aaacGTACTGTGTCTCTGTCAAC<br>Tc |
| lentiV2-AHR_1         | caccgATCGCAAACAAAGCCAA<br>CTG | aaacCAGTTGGCTTTGTTTGCGA<br>Tc |
| lentiV2-AHR_2         | caccgCTTACTTCGGATATGGG<br>ACT | aaacAGTCCCATATCCGAAGTAA<br>Gc |
| lentiV2-MED12_1       | caccgCAGTGAGTAGTGCCAAA<br>CCA | aaacTGGTTTGGCACTACTCACT<br>Gc |
| lentiV2-MED12_2       | caccgACATCGACTGCTGGACA<br>ATG | aaacCATTGTCCAGCAGTCGAT<br>GTc |
