# Supplementary material
Source: PubMed Central journal article supplement (PMC9769698)
Supplement: NIHMS1800357-supplement-10.pdf [file NIHMS1800357-supplement-10.pdf]

**Supplementary Table 3. Primers used for CRISPR screens.**

|                 |                                                                                                  |
|-----------------|--------------------------------------------------------------------------------------------------|
| P5 0 nt stagger | AATGATACGGCGACCACCGAGATCTACACTCTTTCCCTACACGAC<br>GCTCTTCCGATCTTTGTGGAAAGGACGAAACACCG             |
| P5 1nt stagger  | AATGATACGGCGACCACCGAGATCTACACTCTTTCCCTACACGAC<br>GCTCTTCCGATCTCTTGTGGAAAGGACGAAACACCG            |
| P5 2 nt stagger | AATGATACGGCGACCACCGAGATCTACACTCTTTCCCTACACGAC<br>GCTCTTCCGATCTGCTTGTGGAAAGGACGAAACACCG           |
| P5 3 nt stagger | AATGATACGGCGACCACCGAGATCTACACTCTTTCCCTACACGAC<br>GCTCTTCCGATCTAGCTTGTGGAAAGGACGAAACACCG          |
| P5 4 nt stagger | AATGATACGGCGACCACCGAGATCTACACTCTTTCCCTACACGAC<br>GCTCTTCCGATCTCAACTTGTGGAAAGGACGAAACACCG         |
| P5 6 nt stagger | AATGATACGGCGACCACCGAGATCTACACTCTTTCCCTACACGAC<br>GCTCTTCCGATCTTGCACCTTGTGGAAAGGACGAAACACCG       |
| P5 7nt stagger  | AATGATACGGCGACCACCGAGATCTACACTCTTTCCCTACACGAC<br>GCTCTTCCGATCTACGCAACTTGTGGAAAGGACGAAACACCG      |
| P5 8nt stagger  | AATGATACGGCGACCACCGAGATCTACACTCTTTCCCTACACGAC<br>GCTCTTCCGATCTGAAGACCCTTGTGGAAAGGACGAAACACCG     |
| P7 Primer A01   | CAAGCAGAAGACGGCATAACGAGATCGGTTCAAGTGACTGGAGTTC<br>AGACGTGTGCTCTTCCGATCTCCAATTCCCCTCCTTTCAAGACCT  |
| P7 Primer A02   | CAAGCAGAAGACGGCATAACGAGATGCTGGATTGTGACTGGAGTTC<br>AGACGTGTGCTCTTCCGATCTCCAATTCCCCTCCTTTCAAGACCT  |
| P7 Primer A03   | CAAGCAGAAGACGGCATAACGAGATTAACCTCGGGTGACTGGAGTTC<br>AGACGTGTGCTCTTCCGATCTCCAATTCCCCTCCTTTCAAGACCT |
| P7 Primer A04   | CAAGCAGAAGACGGCATAACGAGATTAACAGTTGTGACTGGAGTTC<br>AGACGTGTGCTCTTCCGATCTCCAATTCCCCTCCTTTCAAGACCT  |
