# Supplementary material
Source: PubMed Central journal article supplement (PMC9769698)
Supplement: NIHMS1800357-supplement-11.pdf [file NIHMS1800357-supplement-11.pdf]

**Supplementary Table 4. siRNA used for RNA interference.**

| siRNA                            | Identifier       | Source    |
|----------------------------------|------------------|-----------|
| ON-TARGETplus Human AHR siRNA    | L-004990-00-0005 | Dharmacon |
| ON-TARGETplus Human MAU2siRNA    | L-031981-01-0005 | Dharmacon |
| ON-TARGETplus Human MED12 siRNA  | L-009092-00-0005 | Dharmacon |
| ON-TARGETplus Human NIPBL siRNA  | L-012980-00-0005 | Dharmacon |
| ON-TARGETplus Non-targeting Pool | D-001810-10-20   | Dharmacon |
