# Supplementary material
Source: PubMed Central journal article supplement (PMC9769698)
Supplement: NIHMS1800357-supplement-12.pdf [file NIHMS1800357-supplement-12.pdf]

**Supplementary Table 5. crRNAs and tracrRNA used for CRISPR-RNP.**

| crRNAs or tracrRNA                             | Identifier        | Source    |
|------------------------------------------------|-------------------|-----------|
| Edit-R Human AHR (196) crRNA, 2 nmol           | CM-004990-01-0002 | Dharmacon |
| Edit-R Human AHR (196) crRNA, 2 nmol           | CM-004990-03-0002 | Dharmacon |
| Edit-R Human MED12 (9968) crRNA, 2 nmol        | CM-009092-01-0002 | Dharmacon |
| Edit-R Human MED12 (9968) crRNA, 2 nmol        | CM-009092-03-0002 | Dharmacon |
| Edit-R Human NIPBL (25836) crRNA, 2 nmol       | CM-012980-01-0002 | Dharmacon |
| Edit-R Human NIPBL (25836) crRNA, 2 nmol       | CM-012980-03-0002 | Dharmacon |
| Edit-R Human MAU2 (23383) crRNA, 2 nmol        | CM-031981-01-0002 | Dharmacon |
| Edit-R Human MAU2 (23383) crRNA, 2 nmol        | CM-031981-03-0002 | Dharmacon |
| Edit-R CRISPR-Cas9 Synthetic tracrRNA, 20 nmol | U-002005-20       | Dharmacon |
