# Supplementary material
Source: PubMed Central journal article supplement (PMC9769698)
Supplement: NIHMS1800357-supplement-13.pdf [file NIHMS1800357-supplement-13.pdf]

**Supplementary Table 6. Primers used for Real-time quantitative PCR.**

| Gene                             | F Primer               | R Primer                     |
|----------------------------------|------------------------|------------------------------|
| <i>CYP1B1</i>                    | GAGAACGTACCGGCCACTAT   | AAGGAAGGCCAGGACATAGG         |
| <i>AHRR</i>                      | ATGCCGAGGACGATGATCCC   | CACCCGGAGGTAAGTACAC          |
| <i>PARP7</i>                     | TCTCAGGAGCACTTGGAAGA   | GTGTGGACAGCCTTCGTAGT         |
| <i>β-Actin</i>                   | GAGCACAGAGCCTCGCCTTT   | TCATCATCCATGGTGAGCTG         |
| <i>AHR</i>                       | ATTGTGCCGAGTCCCATATC   | AAGCAGGCGTGCATTAGACT         |
| <i>CYP1A1</i>                    | CTTGGACCTCTTTGGAGCT    | GACCTGCCAATCACTGTG           |
| <i>IL1A</i>                      | ATCAGTACCTCACGGCTGCT   | TGGGTATCTCAGGCATCTCC         |
| <i>IL1B</i>                      | CTCGCCAGTGAAATGATGGCT  | GTCGGAGATTCGTAGCTGGAT        |
| <i>IL6</i>                       | AAATTCGGTACATCCTCGACGG | GGAAGGTTTCAGGTTGTTTTCTG<br>C |
| <i>PAI-2</i>                     | GAAGGGTAGTTATCCTGATGCG | CAGAGCTGAGAGAGCGGAA          |
| <i>ARNT</i>                      | TGTGGACCCAGTTTCTGTGA   | GACCACCACGAAGTGAGGTT         |
| <i>CDKN1A(p21)</i>               | GATGAGTTGGGAGGAGGCAG   | CGGCGTTTGGAGTGGTAGAA         |
| <i>CDKN1B(p27)-<br/>Primers1</i> | CAGCTTGCCCGAGTTCTACT   | AAGAATCGTCGGTTGCAGGT         |
| <i>CDKN1B(p27)-<br/>Primers2</i> | TCTGAGGACACGCATTTGGT   | TTTGACGTCTTCTGAGGCCA         |
| <i>NIPBL-Primers1</i>            | AACCTTGCCAGTGATGACCC   | GCTGGAGGGGCTATGTGAGA         |
| <i>NIPBL-Primers2</i>            | TGGAATTGGATGCATTGGCTG  | GCCTTGACCCATTTCCCGTA         |
